# Supplementary material for: Disruption of mitochondrial electron transport impairs urinary concentration via AMPK-dependent suppression of aquaporin 2
Source: PubMed Central journal article supplement (PMC11601893; doi:10.1172/jci.insight.182087), 2024-11-22
Supplement: jciinsight-9-182087-s119.pdf [file jciinsight-9-182087-s119.pdf]

## **SUPPLEMENTARY MATERIALS**

### **Disruption of mitochondrial electron transport impairs urinary concentration via AMPK-dependent suppression of aquaporin-2**

Joshua S. Carty, Ryoichi Bessho, Yvonne Zuchowski, Jonathan B. Trapani, Olena Davidoff, Hanako Kobayashi, Joseph T. Roland, Jason A. Watts, Andrew S. Terker, Fabian Bock, Juan Pablo Arroyo and Volker H. Haase

#### **Table of Contents:**

Supplementary Table S1  
Supplementary Table S2  
Supplementary Figure S1  
Supplementary Figure S2  
Supplementary Figure S3  
Supplementary Figure S4

## Supplementary Table S1

### Primary and secondary antibodies used for immunofluorescence and immunoblotting.

| Antibody / type                                                             | Host   | Catalog Nr. | Vendor                                      | Dilution               | Time        |
|-----------------------------------------------------------------------------|--------|-------------|---------------------------------------------|------------------------|-------------|
| AMPK $\alpha$ (D5A2)                                                        | rabbit | 5831        | Cell Signaling Technology, Danvers, MA, USA | WB 1:1000<br>IF 1:250  | 2 hr RT     |
| p-AMPK $\alpha$ (T172) (40H9)                                               | rabbit | 2535        | Cell Signaling Technology, Danvers, MA, USA | WB 1:1000<br>IF 1:250  | 3 hr RT     |
| AQP2 (total) - HRP conjugated                                               | mouse  | sc-515770   | Santa Cruz Biotechnology, Dallas, TX, USA   | IF 1:100,<br>WB 1:200  | o/n,<br>4°C |
| AQP2 (total) - FITC conjugated                                              | mouse  | sc-515770   | Santa Cruz Biotechnology, Dallas, TX, USA   | IF 1:100,<br>WB 1:500  | 1 hr RT     |
| AQP2 (total) - AF647 conjugated                                             | mouse  | sc-515770   | Santa Cruz Biotechnology, Dallas, TX, USA   | IF 1:100,<br>WB 1:500  | 1 hr RT     |
| AQP2 (total) - non-conjugated                                               | mouse  | sc-515770   | Santa Cruz Biotechnology, Dallas, TX, USA   | IF 1:100               | o/n<br>4°C  |
| p-AQP2 (S269)                                                               | rabbit | p112-269t   | PhosphoSolutions, Aurora, CO, USA           | WB 1:1000<br>IF 1:250  | 1 hr RT     |
| AQP3 (total)                                                                | Rabbit | HPA014924   | Millipore Sigma, Burlington, MA             | WB 1:1000              | o/n<br>4°C  |
| ENaCy                                                                       | rabbit | SPC-405D    | StressMarq Bioscience, Victoria, BC, Canada | IF 1:250,<br>WB 1:1000 | 1 hr RT     |
| Ezrin                                                                       | rabbit | 3145        | Cell Signaling Technology, Danvers, MA, USA | IF 1:500               | 1 hr RT     |
| NA <sup>+</sup> /K <sup>+</sup> ATPase $\alpha$ 1/ATP1A1 - AF546 conjugated | mouse  | sc-514614   | Santa Cruz Biotech, Dallas, TX, USA         | WB 1:500               | 1 hr RT     |
| GFP                                                                         | rabbit | ab13970     | Abcam, Waltham, MA, USA                     | IF 1:200               | o/n,<br>4°C |
| tdTomato / RFP                                                              | rabbit | 600-401-379 | Rockland Immunochemicals, Limerick, PA, USA | IF 1:200               | o/n,<br>4°C |
| anti-rabbit IgG - HRP conjugated                                            | Goat   | 111-035-003 | Jackson ImmunoResearch, West Grove, PA, USA | WB 1:5000              | 1 hr RT     |
| anti-rabbit IgG AF 647 conjugated                                           | Donkey | 711-605-152 | Jackson ImmunoResearch, West Grove, PA, USA | WB 1:5000              | 1 hr RT     |
| anti-rabbit IgG (H+L)-Cy3                                                   | Donkey | 711-166-152 | Jackson ImmunoResearch, West Grove, PA, USA | IF 1:200               | 1 hr RT     |
| anti-mouse IgG (H+L)-Cy5                                                    | Donkey | 715-175-150 | Jackson ImmunoResearch, West Grove, PA, USA | IF 1:200               | 1 hr RT     |
| anti-Chicken IgY (H+L) Alexa Fluor 488                                      | Goat   | A-11039     | Thermo Fisher Scientific, Waltham, MA, USA  | IF 1:500               | 1 hr RT     |

Abb.: IF, immunofluorescence; o/n, overnight; RT, room temperature; WB, Western blot.

## Supplementary Table S2

Serum electrolytes in control and *HoxB7-Qpc<sup>-/-</sup>* mice.

| Genotype                       | nbr | Na <sup>+</sup> (mmol/L) | K <sup>+</sup> (mmol/L) | Cl <sup>-</sup> (mmol/L) | iCa <sup>2+</sup> (mg/dL) | HCO <sub>3</sub> <sup>-</sup> (mmol/L) | Anion gap  |
|--------------------------------|-----|--------------------------|-------------------------|--------------------------|---------------------------|----------------------------------------|------------|
| Control                        | n=3 | 147.7 ± 0.5              | 3.2 ± 0.2               | 107.3 ± 1.2              | 1.30 ± 0.03               | 24.3 ± 0.5                             | 20.0 ± 0.8 |
| <i>HoxB7-Qpc<sup>-/-</sup></i> | n=3 | 146.7 ± 0.9              | 3.5 ± 0.5               | 109.0 ± 1.6              | 1.30 ± 0.01               | 22.3 ± 2.1                             | 19.7 ± 0.5 |

Abb.: nbr, number of mice.

## Supplementary Figures

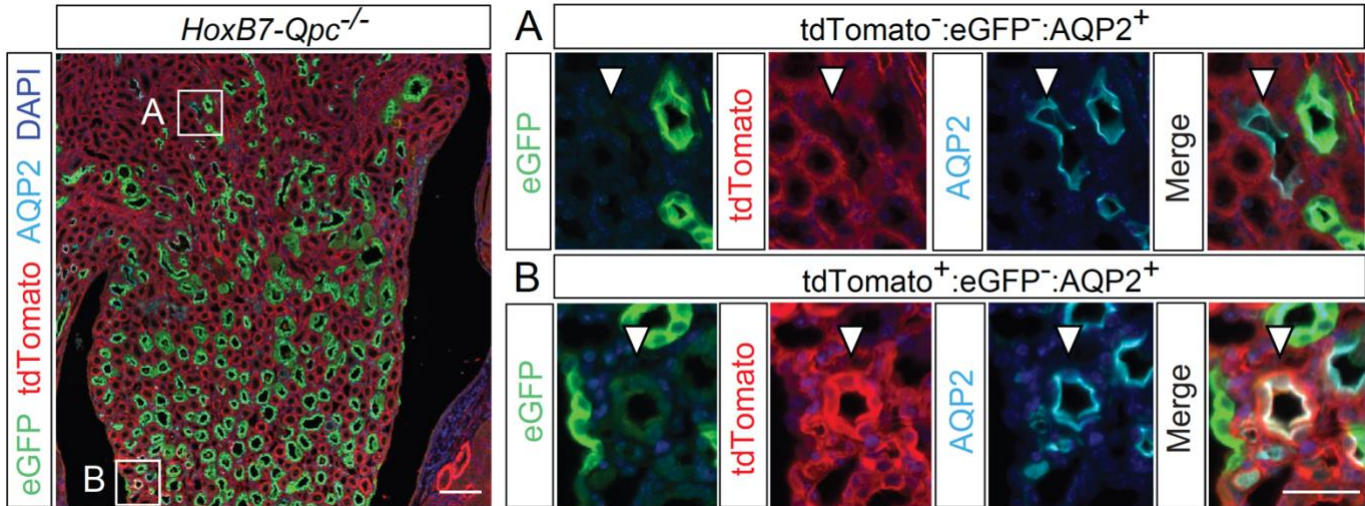

**Supplementary Figure S1. Efficient recombination of *Qpc* in *HoxB7-Qpc*<sup>-/-</sup> kidneys** (linked to Figure 1). To investigate whether AQP2(+):eGFP(-) epithelial cells represent CD cells that did not recombine or cells with an inactive Cre-reporter allele, we performed co-staining for tdTomato (tdT) in 6-month-old *HoxB7-Qpc*<sup>-/-</sup> mice. At baseline (no recombination), the active reporter allele expresses tdT (red fluorescence). Cre-mediated recombination switches the expression from tdT to eGFP. The lack of tdT expression in eGFP(-):AQP2(+) cells (panel A) indicates that the reporter is not active, whereas tdT expression in eGFP(-):AQP2(+) cells (panel B) indicates that Cre-mediated recombination did not occur. Scale bars: 100  $\mu$ m (low magnification), 50  $\mu$ m (high magnification). Abb.: AQP2, aquaporin 2; DAPI, 4',6-diamidino-2-phenylindole; eGFP, enhanced green fluorescence protein.

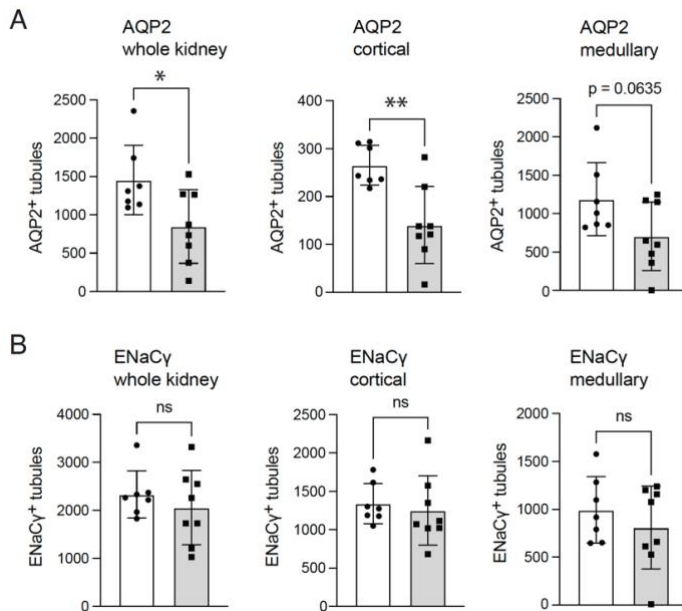

**Supplementary Figure S2. AQP2-expressing tubules are reduced in *HoxB7-Qpc*<sup>-/-</sup> kidneys** (linked to Figure 2). (A) Counts of AQP2(+) tubules, and (B) ENaCy(+) tubules in cortex, medulla, or whole kidney. For each kidney section, all tubules were counted. Counts were then segregated by region; *Cre*(-) littermate control (n=7) and *HoxB7-Qpc*<sup>-/-</sup> mice (n=8); *Cre*(-) littermate control (n=7) and *HoxB7-Qpc*<sup>-/-</sup> mice (n=8). Data are represented as average mean values  $\pm$  SD; two-tailed Student's *t*-test, \**P* < 0.05, \*\**P* < 0.01; ns = not significant.

**Supplementary Figure S3. Total AQP3 protein abundance in *HoxB7-Qpc*<sup>-/-</sup> mice** (linked to Figure 3). Total aquaporin-3 (AQP3) protein levels in whole kidney lysates from *Cre*(-) littermate control and *HoxB7-Qpc*<sup>-/-</sup> mice; n = 6 and 5, respectively. Data are represented by mean values ± SD; two-tailed Student's *t*-test, ns = not significant. Abb.: AU, arbitrary units.

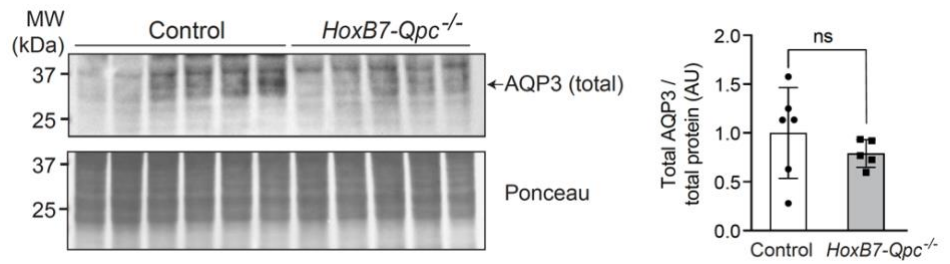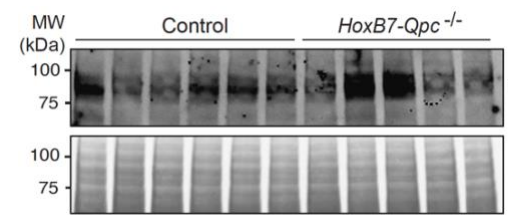

and 5, respectively. Data are represented by mean values ± SD; two-tailed Student's *t*-test, ns = not significant. Abb.: AU, arbitrary units.

**Supplementary Figure S4. Total Na<sup>+</sup>K<sup>+</sup> ATPase protein abundance in *HoxB7-Qpc*<sup>-/-</sup> mice** (linked to Figure 3). Total Na<sup>+</sup>/K<sup>+</sup> ATPase α1 (ATP1A1) protein levels in whole kidney lysates from *Cre*(-) littermate control and *HoxB7-Qpc*<sup>-/-</sup> mice; n = 6 and 5, respectively. Data are represented by mean values ± SD; two-tailed Student's *t*-test, ns = not significant. Abb.: AU, arbitrary units.
