# Supplementary material for: Disruption of mitochondrial electron transport impairs urinary concentration via AMPK-dependent suppression of aquaporin 2
Source: PubMed Central journal article supplement (PMC11601893; doi:10.1172/jci.insight.182087), 2024-11-22

Figure 1 - DNA gel to assess *Qpc* recombination by genomic PCR

Figure 1A

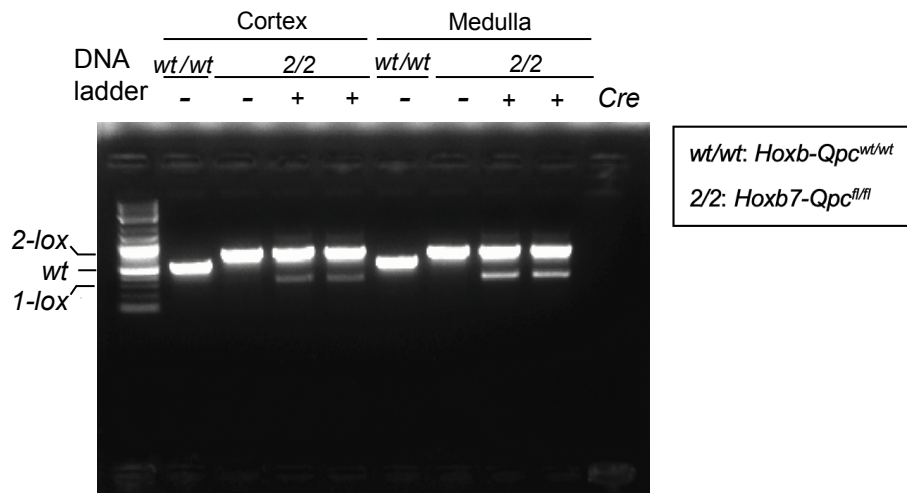

Figure 3 - Whole kidney lysates used to assess total AQP2

Figure 3A

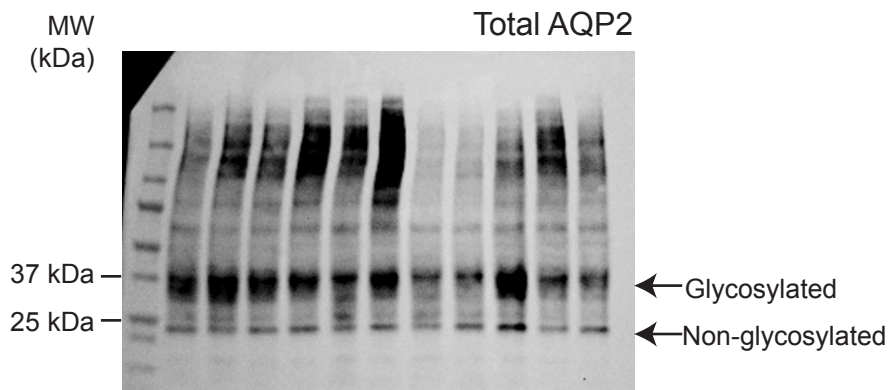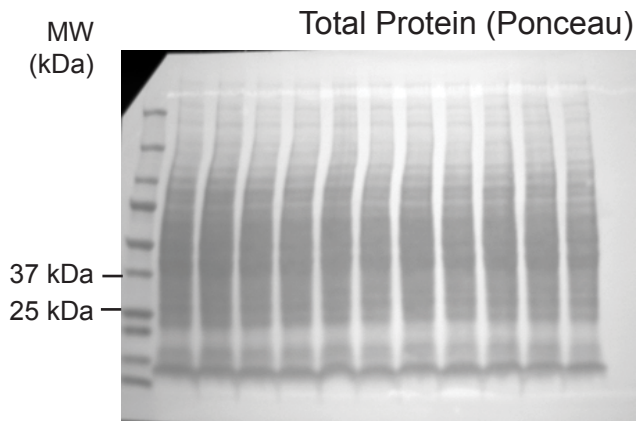

Figure 5 - IMCD cell lysates treated with antimycin A and/or SBI

Figure 5B, Panel 1

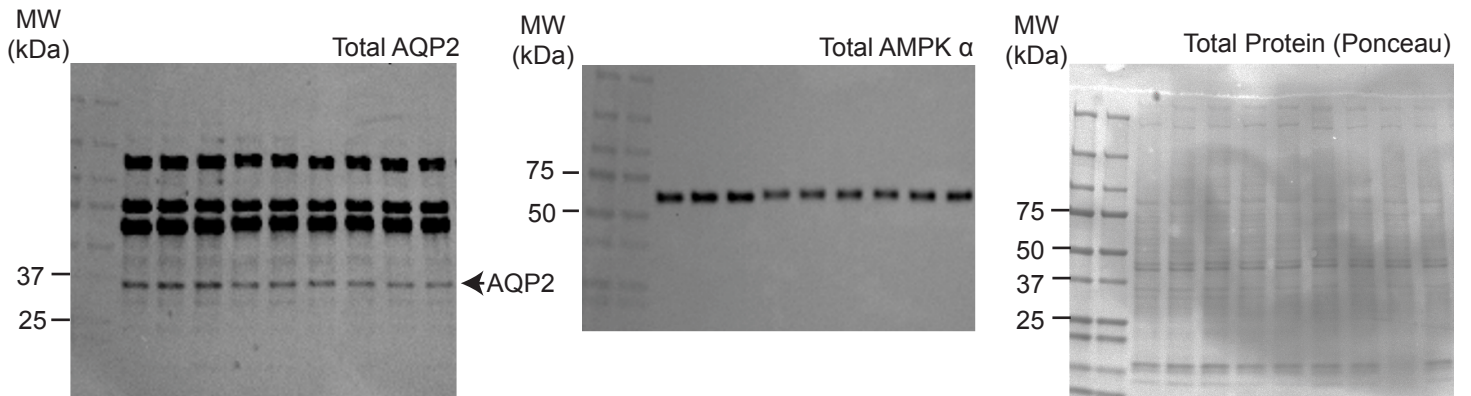

Figure 5B, Panel 2

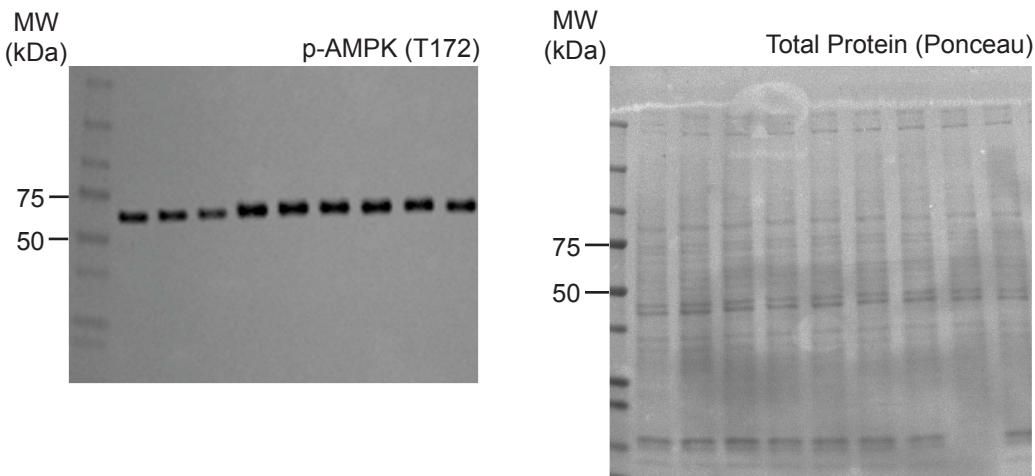

Figure 5C

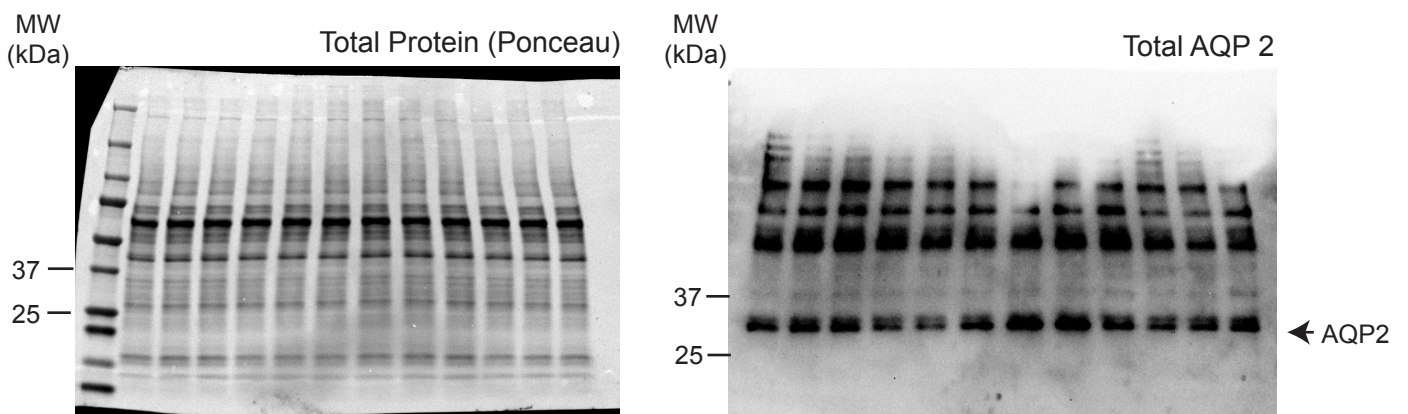

**Figure 6 - Whole kidney lysates used to assess total AMPK $\alpha$  and p-AMPK (T172)**

Figure 6A

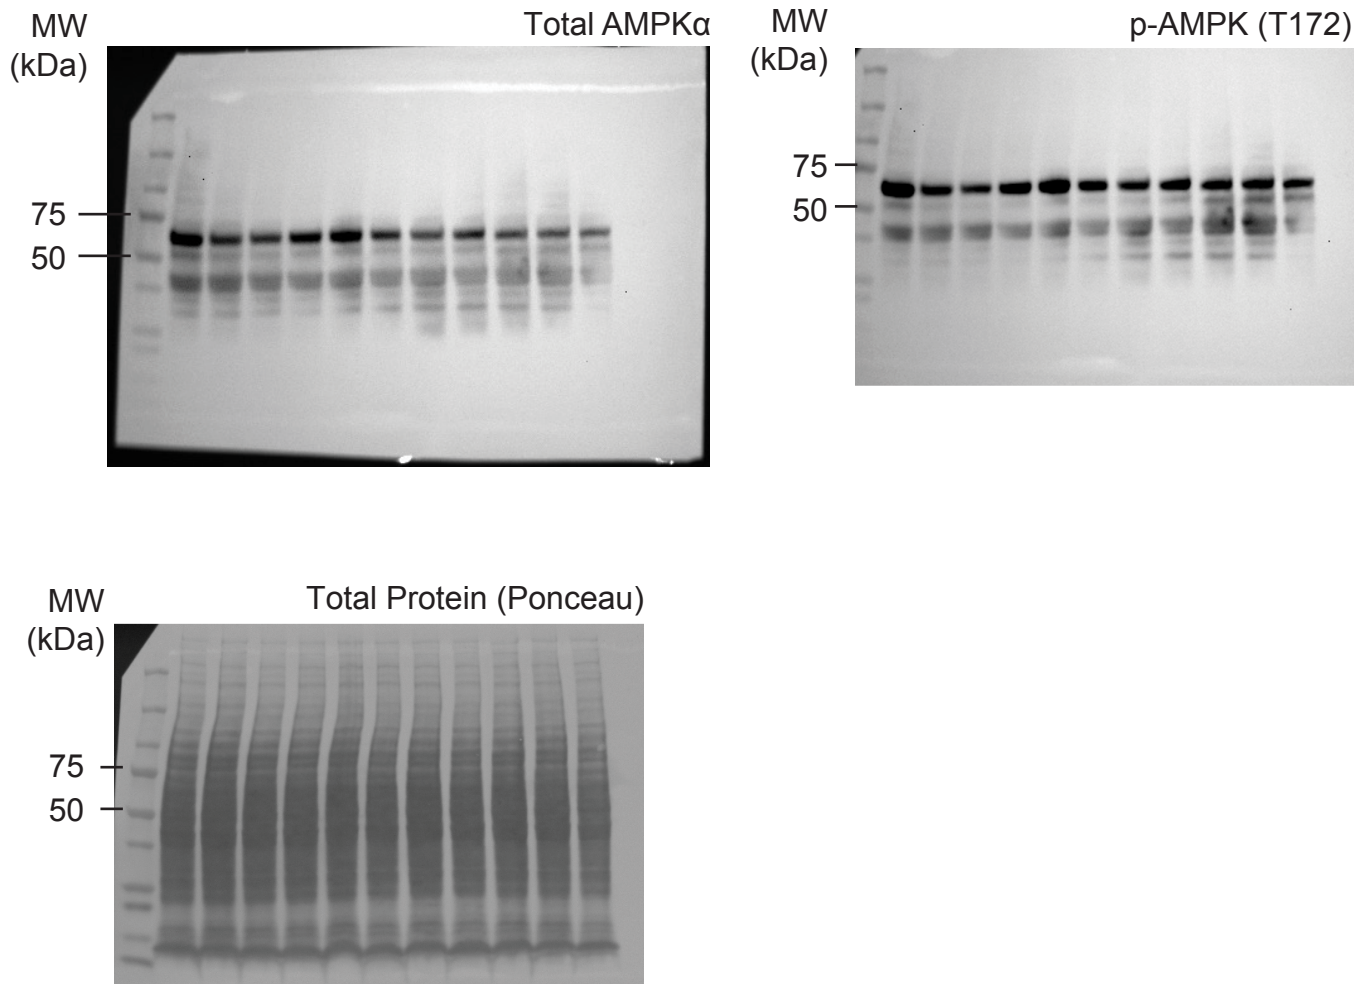

**Figure 7 - Whole kidney lysates used to assess total Aqp2, AMPK, and p-AMPK (T172) post SBI treatment**

Figure 7B

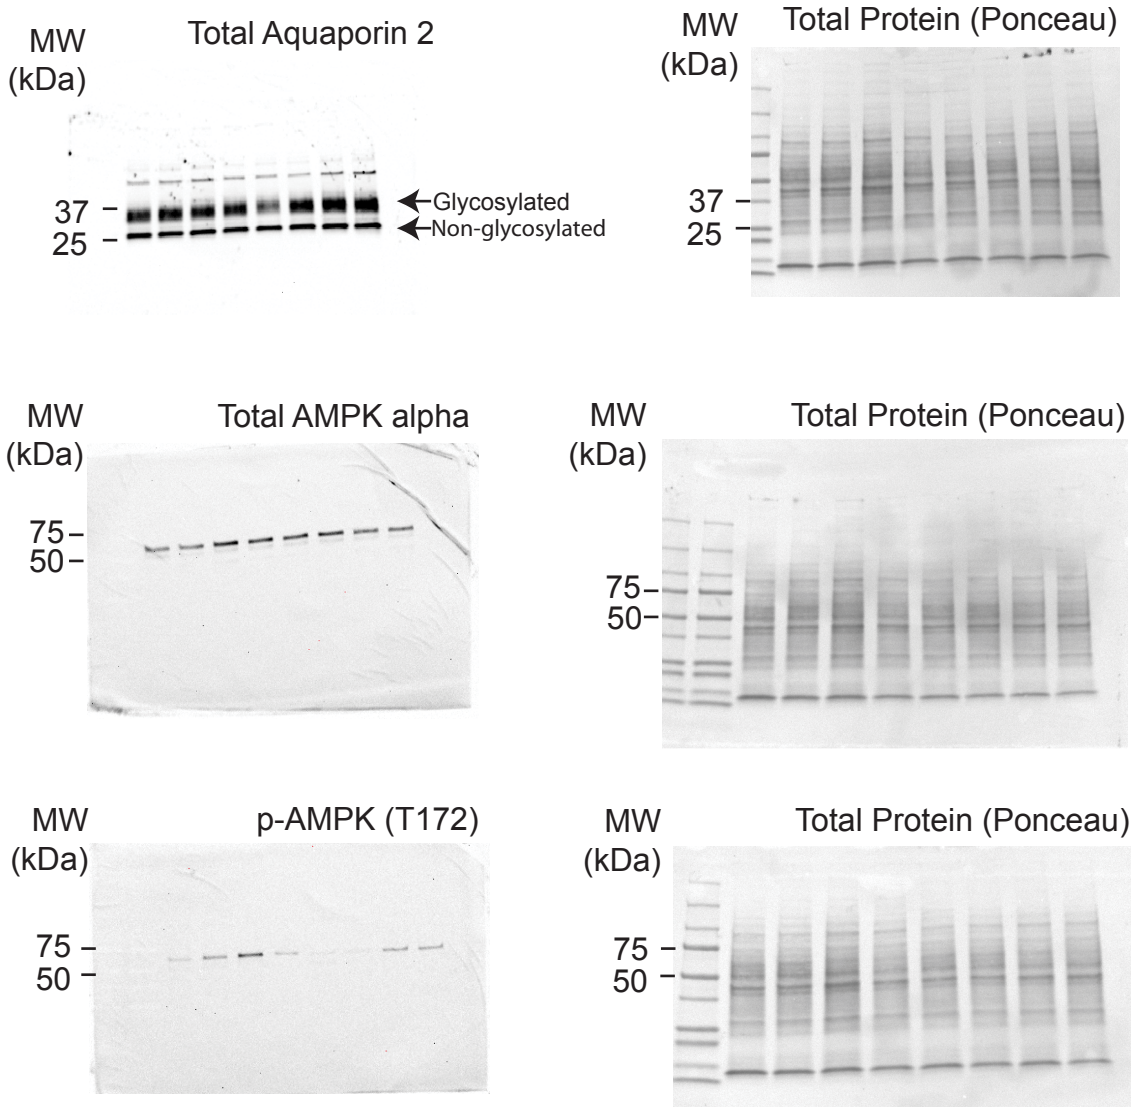

Supplementary Figure S3 - Whole kidney lysates used to assess total AQP3

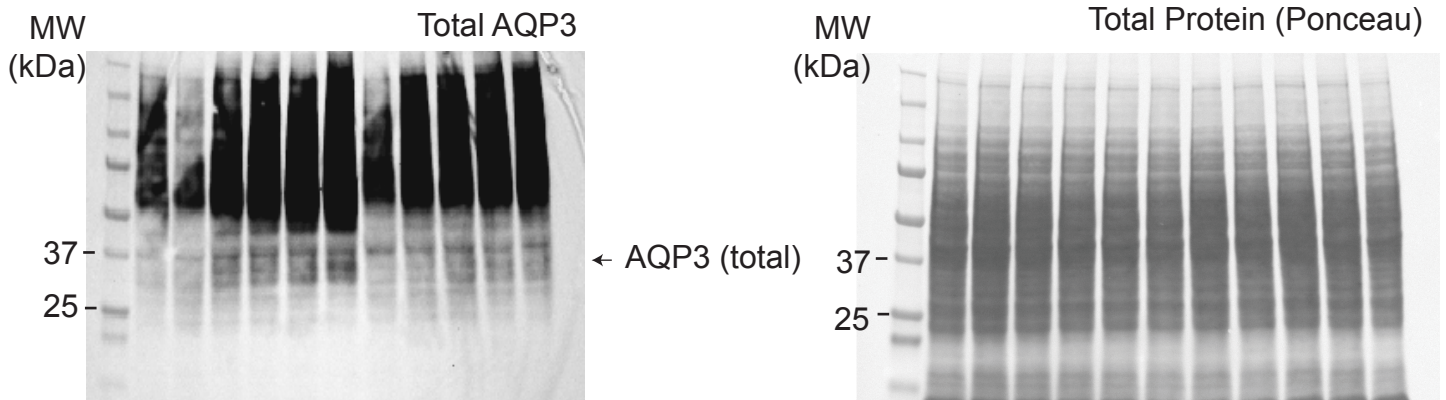

Supplementary Figure S4 - Whole kidney lysates used to assess total Na<sup>+</sup>/K<sup>+</sup> ATPase  $\alpha$ 1

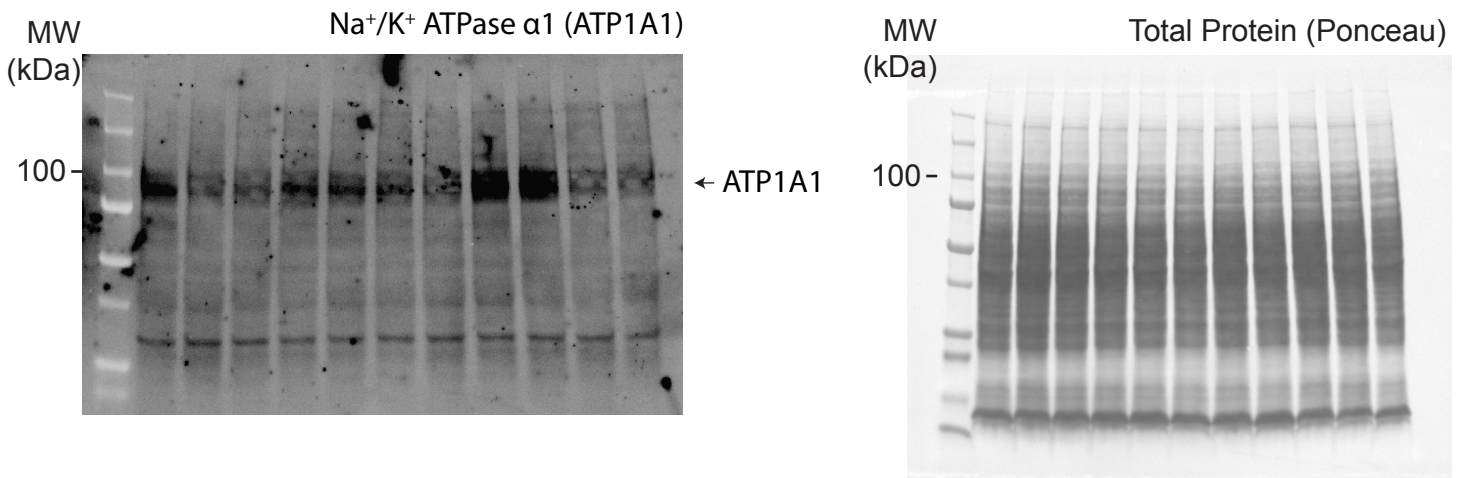

Supplement: jciinsight-9-182087-s120.pdf [file jciinsight-9-182087-s120.pdf]
